# Supplementary material for: Deficiency in Dipeptidyl Peptidase-4 Promotes Chemoresistance Through the CXCL12/CXCR4/mTOR/TGFβ Signaling Pathway in Breast Cancer Cells
Source: PubMed Central journal article supplement (PMC7037814; doi:10.3390/ijms21030805), 2020-01-26
Supplement: ijms-21-00805-s001.pdf [file ijms-21-00805-s001.pdf]

Supplementary Materials:

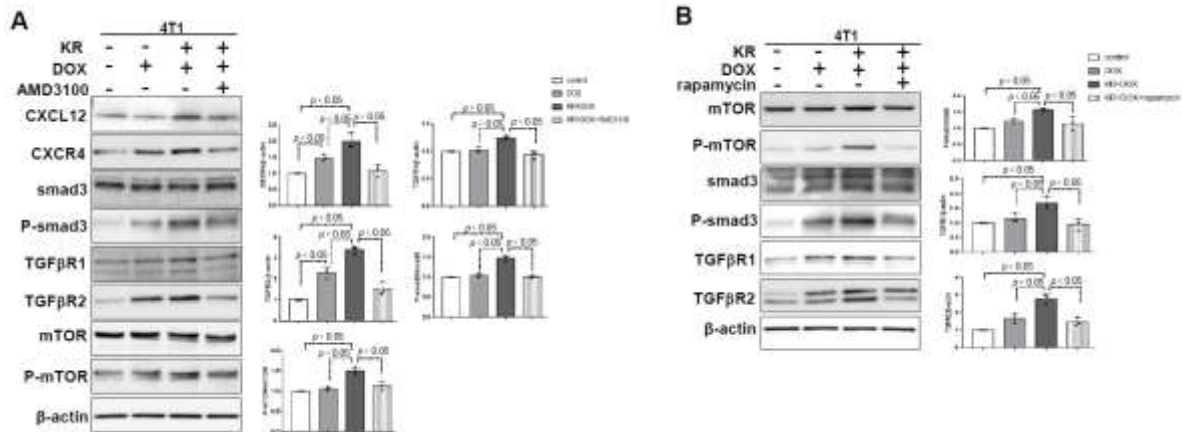

**Figure S1.** (A) Western blot analysis of CXCL12, CXCR4, phosphorylation smad3 (P-smad3), TGFβR1, TGFβR2 and phosphorylation mTOR (P-mTOR) in 4T1 cells pretreated with KR62436 (50 μmol/L) for 48 h and then treated with or without DOX (0.425 μmol/L) in the presence or absence of AMD3100 (30 μmol/L) for another 48 h. (B) Western blot analysis of phosphorylation smad3 (P-smad3), TGFβR1 and TGFβR2 in 4T1 cells in 4T1 cells pretreated with KR62436 (50 μmol/L) for 48 h and then treated with or without DOX (0.425 μmol/L) in the presence or absence of rapamycin (1 μmol/L) for another 48 h. All densitometric analysis of CXCL12, CXCR4, TGFβR1 and TGFβR2 protein expression relative to β-actin levels, P-smad3 protein expression relative to smad3 levels and P-mTOR protein expression relative to mTOR ( $n = 3$ , per group) were performed by using ImageJ.

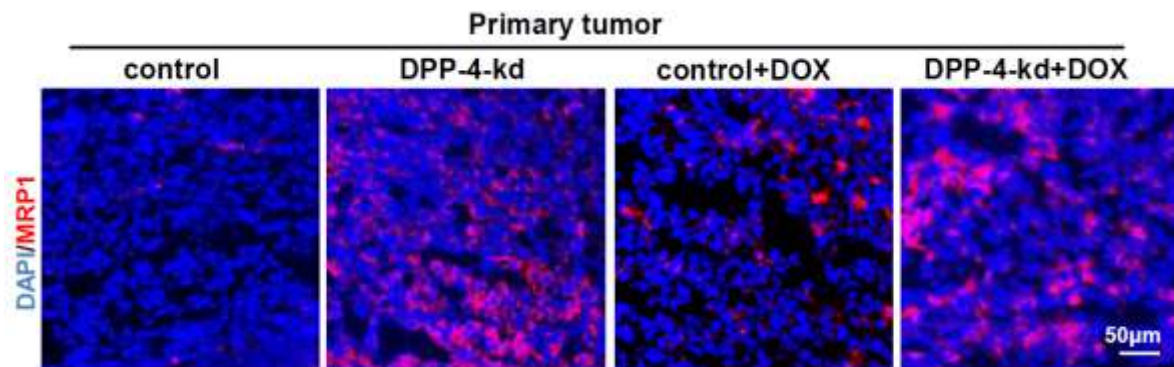

**Figure S2.** Immunofluorescence analysis of MRP1 expression in the primary tumors. For each group, representative images of six different fields of view at 200× magnification were evaluated. The scale bar indicated 50 μm each panel.
